# Supplementary material for: Isolation of the Initial Bovine Alphaherpesvirus 1 Isolate from Yanbian, China
Source: MDPI journal article supplement (doi:10.3390/vetsci11080348), 2024-08-01
Supplement: s1 [file s1]

## Sheet: Sheet1
ID	GI	TI	Dye	SI	Ct	Copies	TN	SN
1	G1	A1	SYBR	Unknown	36.62			gB-M
2	G2	A2	SYBR	Unknown	35.27			gB-0.5
3	G3	A3	SYBR	Unknown	34.63			gB-1
4	G4	A4	SYBR	Unknown	30.1			gB-2
5	G5	A5	SYBR	Unknown	24.54			gB-4
6	G6	A6	SYBR	Unknown	20.16			gB-6
7	G7	A7	SYBR	Unknown	19.85			gB-8
8	G8	A8	SYBR	Unknown	19.12			gB-12
9	G9	A9	SYBR	Unknown	18.34			gB-24
10	G10	A10	SYBR	Unknown	18.34			gB-36
11	G11	A11	SYBR	Unknown	17.73			gB-48
12	G12	A12	SYBR	Unknown	18.71			gB-60
13	G13	B1	SYBR	Unknown	36.88			gC-M
14	G14	B2	SYBR	Unknown	35.81			gC-0.5
15	G15	B3	SYBR	Unknown	35.88			gC-1
16	G16	B4	SYBR	Unknown	35.56			gC-2
17	G17	B5	SYBR	Unknown	30.04			gC-4
18	G18	B6	SYBR	Unknown	24.7			gC-6
19	G19	B7	SYBR	Unknown	22.14			gC-8
20	G20	B8	SYBR	Unknown	20.32			gC-12
21	G21	B9	SYBR	Unknown	18.92			gC-24
22	G22	B10	SYBR	Unknown	19.15			gC-36
23	G23	B11	SYBR	Unknown	18.7			gC-48
24	G24	B12	SYBR	Unknown	19.51			gC-60
25	G25	C1	SYBR	Unknown	37.82			gD-M
26	G26	C2	SYBR	Unknown	36.33			gD-0.5
27	G27	C3	SYBR	Unknown	36.32			gD-1
28	G28	C4	SYBR	Unknown	36.47			gD-2
29	G29	C5	SYBR	Unknown	35.06			gD-4
30	G30	C6	SYBR	Unknown	31.42			gD-6
31	G31	C7	SYBR	Unknown	30.67			gD-8
32	G32	C8	SYBR	Unknown	29.33			gD-12
33	G33	C9	SYBR	Unknown	28.28			gD-24
34	G34	C10	SYBR	Unknown	28.13			gD-36
35	G35	C11	SYBR	Unknown	27.26			gD-48
36	G36	C12	SYBR	Unknown	28.56			gD-60
37	G37	D1	SYBR	Unknown	37.67			gE-M
38	G38	D2	SYBR	Unknown	34.79			gE-0.5
39	G39	D3	SYBR	Unknown	32.74			gE-1
40	G40	D4	SYBR	Unknown	28.54			gE-2
41	G41	D5	SYBR	Unknown	23.73			gE-4
42	G42	D6	SYBR	Unknown	20.88			gE-6
43	G43	D7	SYBR	Unknown	19.8			gE-8
44	G44	D8	SYBR	Unknown	19.55			gE-12
45	G45	D9	SYBR	Unknown	19.39			gE-24
46	G46	D10	SYBR	Unknown	19.31			gE-36
47	G47	D11	SYBR	Unknown	18.82			gE-48
48	G48	D12	SYBR	Unknown	20.31			gE-60
49	G49	E1	SYBR	Unknown	35.51			gH-M
50	G50	E2	SYBR	Unknown	35.53			gH-0.5
51	G51	E3	SYBR	Unknown	35.23			gH-1
52	G52	E4	SYBR	Unknown	31.93			gH-2
53	G53	E5	SYBR	Unknown	24.37			gH-4
54	G54	E6	SYBR	Unknown	21.22			gH-6
55	G55	E7	SYBR	Unknown	20.33			gH-8
56	G56	E8	SYBR	Unknown	20.09			gH-12
57	G57	E9	SYBR	Unknown	19.6			gH-24
58	G58	E10	SYBR	Unknown	19.67			gH-36
59	G59	E11	SYBR	Unknown	19.17			gH-48
60	G60	E12	SYBR	Unknown	20.05			gH-60
61	G61	F1	SYBR	Unknown	37.13			gK-M
62	G62	F2	SYBR	Unknown	35.92			gK-0.5
63	G63	F3	SYBR	Unknown	36.25			gK-1
64	G64	F4	SYBR	Unknown	36.74			gK-2
65	G65	F5	SYBR	Unknown	34.54			gK-4
66	G66	F6	SYBR	Unknown	35.3			gK-6
67	G67	F7	SYBR	Unknown	35.35			gK-8
68	G68	F8	SYBR	Unknown	35.68			gK-12
69	G69	F9	SYBR	Unknown	35.16			gK-24
70	G70	F10	SYBR	Unknown	36.49			gK-36
71	G71	F11	SYBR	Unknown	36.23			gK-48
72	G72	F12	SYBR	Unknown	34.39			gK-60
73	G73	G1	SYBR	Unknown	28.31			gL-M
74	G74	G2	SYBR	Unknown	28.36			gL-0.5
75	G75	G3	SYBR	Unknown	28.36			gL-1
76	G76	G4	SYBR	Unknown	27.23			gL-2
77	G77	G5	SYBR	Unknown	26.76			gL-4
78	G78	G6	SYBR	Unknown	23.55			gL-6
79	G79	G7	SYBR	Unknown	21.42			gL-8
80	G80	G8	SYBR	Unknown	20.64			gL-12
81	G81	G9	SYBR	Unknown	20.43			gL-24
82	G82	G10	SYBR	Unknown	20.78			gL-36
83	G83	G11	SYBR	Unknown	19.94			gL-48
84	G84	G12	SYBR	Unknown	20.65			gL-60
85	G85	H1	SYBR	Unknown	21.14			GAPDH-M
86	G86	H2	SYBR	Unknown	21.42			GAPDH-0.5
87	G87	H3	SYBR	Unknown	21.76			GAPDH-1
88	G88	H4	SYBR	Unknown	21.81			GAPDH-2
89	G89	H5	SYBR	Unknown	21.46			GAPDH-4
90	G90	H6	SYBR	Unknown	21.28			GAPDH-6
91	G91	H7	SYBR	Unknown	21.67			GAPDH-8
92	G92	H8	SYBR	Unknown	21.48			GAPDH-12
93	G93	H9	SYBR	Unknown	21.23			GAPDH-24
94	G94	H10	SYBR	Unknown	21.93			GAPDH-36
95	G95	H11	SYBR	Unknown	21.12			GAPDH-48
96	G96	H12	SYBR	Unknown	21.59			GAPDH-60
