# Supplementary material for: Isolation of the Initial Bovine Alphaherpesvirus 1 Isolate from Yanbian, China
Source: MDPI journal article supplement (doi:10.3390/vetsci11080348), 2024-08-01
Supplement: s1 [file s1]

**Table S1.** Determining the TCID<sub>50</sub> of BoAHV1 in MDBK cell culture.

| Virus<br>dilution<br>multiples | The number of CPE<br>holes in the same<br>dilution ratio |                                   | Total<br>number<br>of CPE<br>holes | Total<br>number<br>of<br>CPE-free<br>holes | Total<br>number<br>of cell<br>pores | The percentage of<br>CPE pores in total<br>cell pores was<br>calculated (%) |
|--------------------------------|----------------------------------------------------------|-----------------------------------|------------------------------------|--------------------------------------------|-------------------------------------|-----------------------------------------------------------------------------|
|                                | Number<br>of CPE<br>holes                                | Number<br>of<br>CPE-free<br>holes |                                    |                                            |                                     |                                                                             |
| 10 <sup>-1</sup>               | 8                                                        | 0                                 | 42                                 | 0                                          | 42                                  | 100 (42/42)                                                                 |
| 10 <sup>-2</sup>               | 8                                                        | 0                                 | 34                                 | 0                                          | 34                                  | 100 (34/34)                                                                 |
| 10 <sup>-3</sup>               | 7                                                        | 1                                 | 26                                 | 1                                          | 27                                  | 96.3 (26/27)                                                                |
| 10 <sup>-4</sup>               | 7                                                        | 1                                 | 19                                 | 2                                          | 21                                  | 90.5 (19/21)                                                                |
| 10 <sup>-5</sup>               | 6                                                        | 2                                 | 12                                 | 4                                          | 16                                  | 75 (12/16)                                                                  |
| 10 <sup>-6</sup>               | 4                                                        | 4                                 | 6                                  | 8                                          | 14                                  | 42.9 (6/14)                                                                 |
| 10 <sup>-7</sup>               | 2                                                        | 6                                 | 2                                  | 14                                         | 16                                  | 12.5 (2/16)                                                                 |
| 10 <sup>-8</sup>               | 0                                                        | 8                                 | 0                                  | 22                                         | 22                                  | 0 (0/22)                                                                    |
| 10 <sup>-9</sup>               | 0                                                        | 8                                 | 0                                  | 30                                         | 30                                  | 0 (0/30)                                                                    |
