# Supplementary material for: Isolation of the Initial Bovine Alphaherpesvirus 1 Isolate from Yanbian, China
Source: MDPI journal article supplement (doi:10.3390/vetsci11080348), 2024-08-01
Supplement: s1 [file s1]

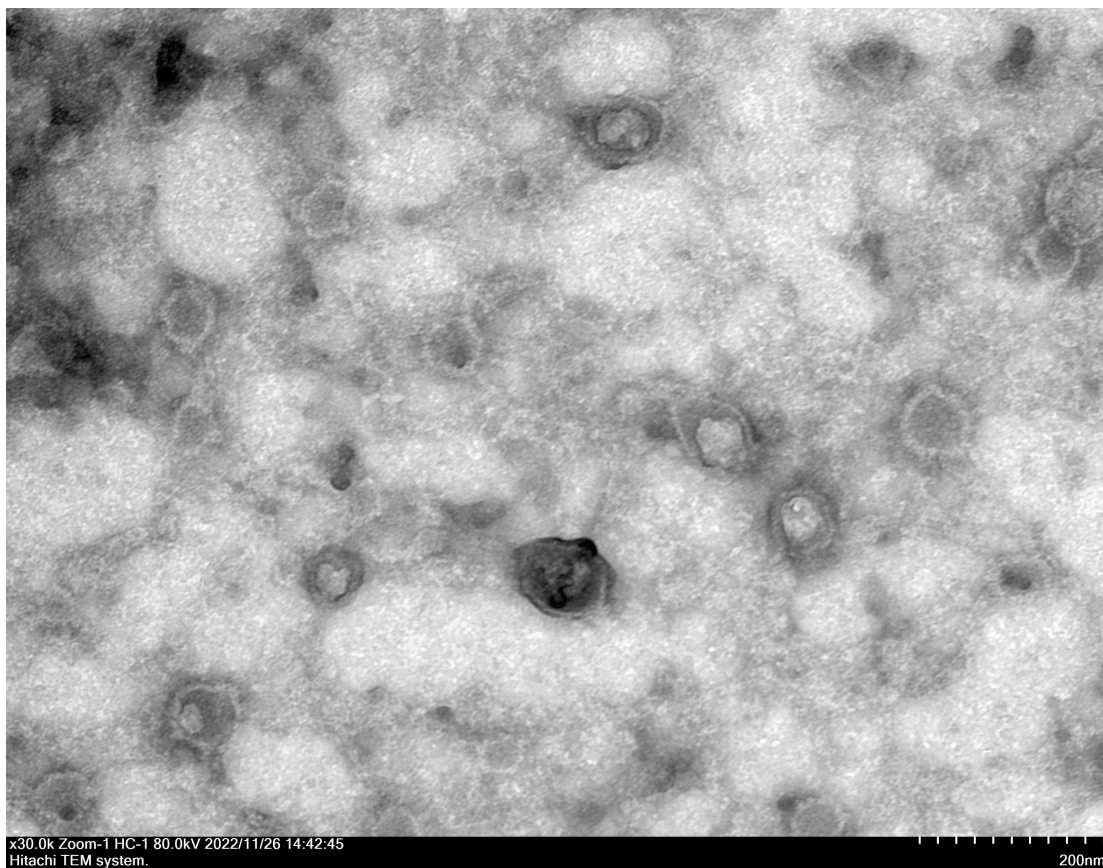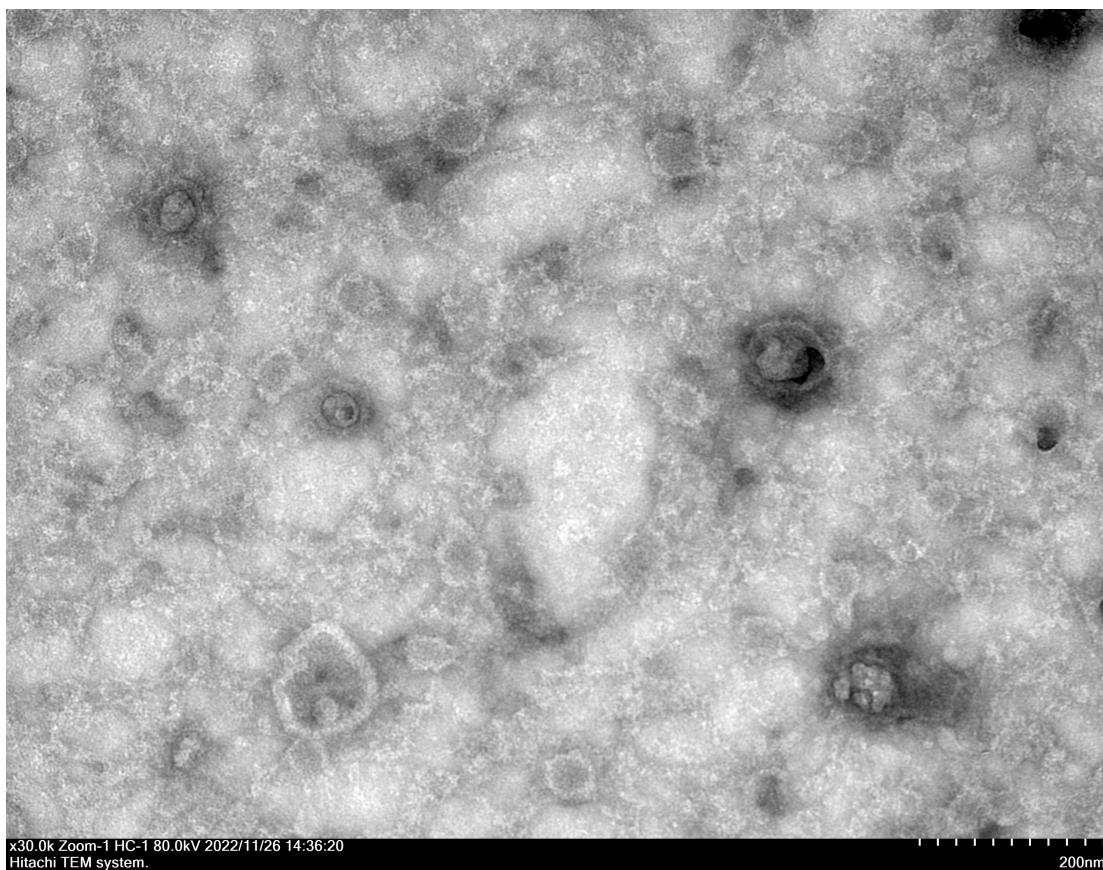

**Additional TEM figures of BoAHV1**
